# Supplementary material
Source: PubMed Central journal article supplement (PMC3908915)
Supplement: NIHMS533224-supplement-Supp_Fig_S1-S3_Table_S1_S3-S4.pdf [file NIHMS533224-supplement-Supp_Fig_S1-S3_Table_S1_S3-S4.pdf]

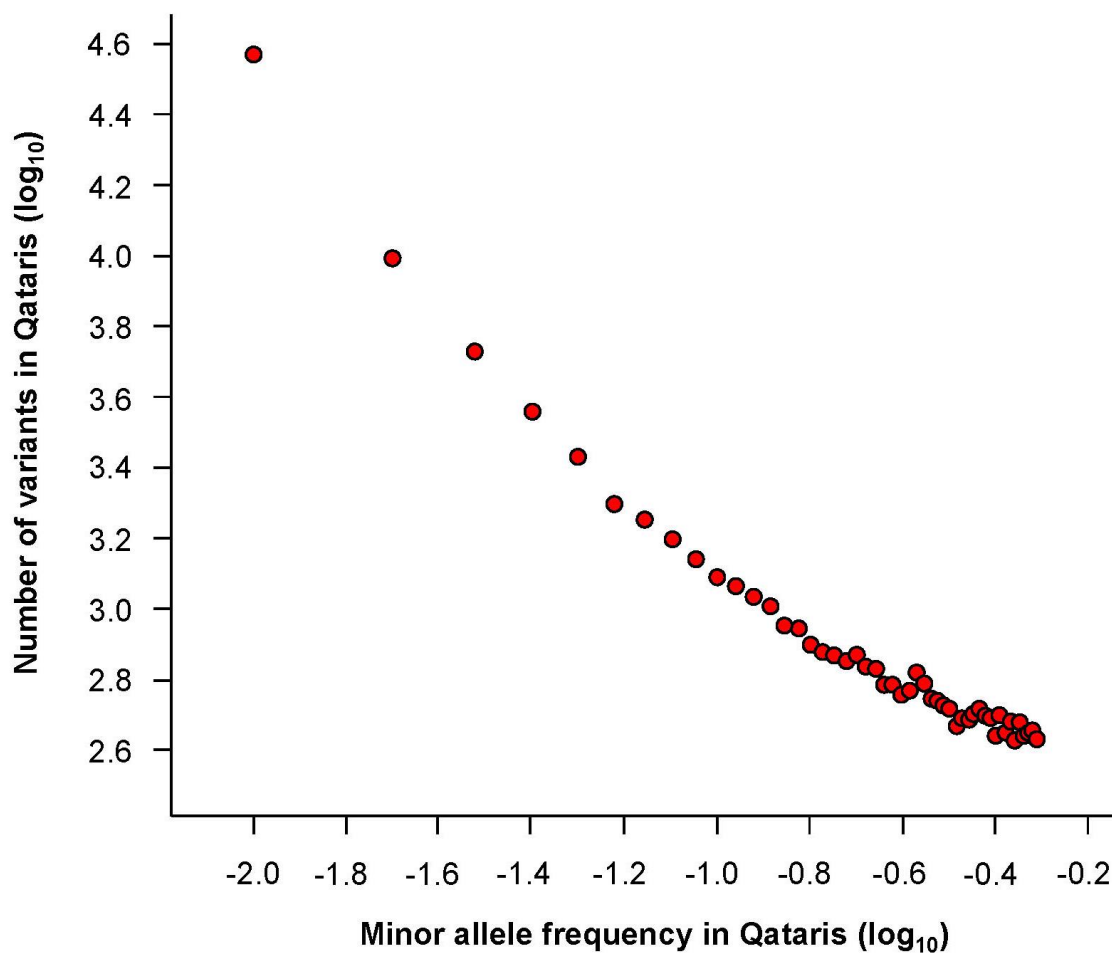

**Supp. Figure S1.** Site frequency spectrums for the total Qatari population. Shown in log<sub>10</sub> scale is the number of variants in the Qatari population on the Y-axis, and the minor allele frequency in Qatari on the X-axis.

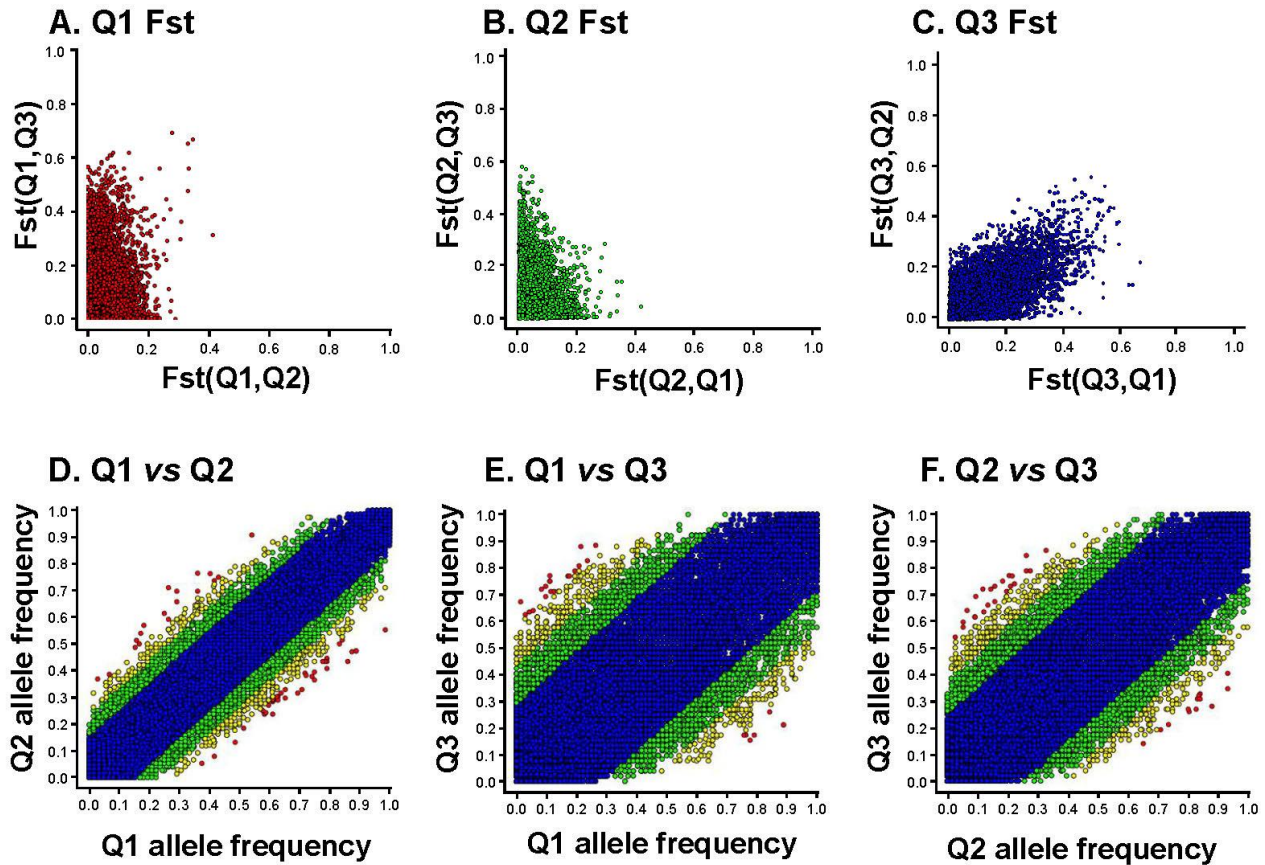

**Supp. Figure S2.** Comparison of the allele frequencies among the Qatari Q1, Q2 and Q3 genetic groups. To identify variants that differentiate Q1, Q2 and Q3 Qatari subpopulations, the allele frequency was compared for 95,840 coding variants using two methods. **A-C.**  $F_{st}$ ; and **D-F.** allele frequency difference. **A-C.**  $F_{st}$  was calculated for comparison of Q1 vs Q2, Q1 vs Q3, and Q2 vs Q3. **A.** is the  $F_{st}$  of Q1 compared to Q2 (x axis) and Q3 (y axis); **B.**  $F_{st}$  of Q2 compared to Q1 (x axis) and Q3 (y axis); and **C.**  $F_{st}$  of Q3 compared to Q1 (x axis) and Q2 (y axis). **D-F.** The standard deviation in absolute value of allele frequency calculated for each pair of populations. **D.** Q1 vs Q2; **E.** Q1 vs Q3; and **F.** Q2 vs Q3. The variants were classified into 4 bins based on standard deviations; variants with allele frequency difference <4 (blue), 4-6 (green), 6-8 (yellow) and >8 (red) standard deviations.

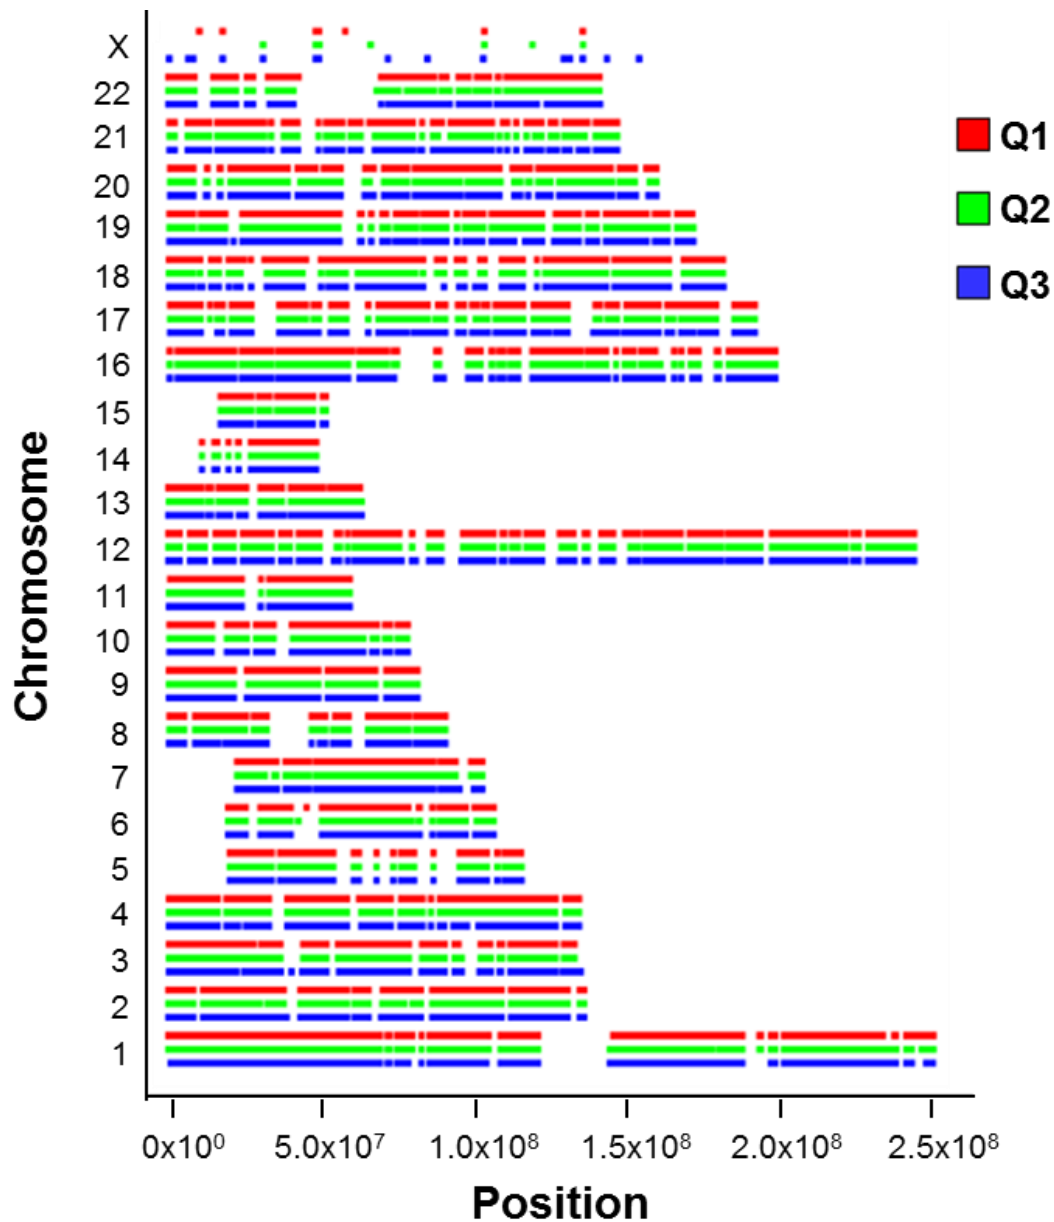

**Supp. Figure S3.** The Qatari exome. In order to provide a major-allele reference exome for future studies of each Qatari subpopulation, variants were identified where the major allele in a Qatari subpopulation is the non-reference allele. Genome-wide distribution of 11,043 variants where the major allele in Q1 is the non-reference allele (red), 11,033 variants where the major allele in Q2 is the non-reference allele (green), and 11,183 variants where the major allele in Q3 is the nonreference allele (blue). The x axis is chromosome position and the y axis is the chromosome.

**Supp. Table S1. SNP Mendelian disease variants directly genotyped in the panel of genetic tests conducted in the Laboratory Medicine and Pathology, Hamad Medical Corporation, Doha, Qatar<sup>1</sup>**

| Disorder                                              | Test                                                                                                                                                                                               |
|-------------------------------------------------------|----------------------------------------------------------------------------------------------------------------------------------------------------------------------------------------------------|
| Fragile X                                             | <i>FRAXA</i> (PCR & Southern blot analysis)                                                                                                                                                        |
| Cystic Fibrosis                                       | Full <i>CFTR</i> sequencing of coding + exon-intron boundaries, CF29 platform, p.Ile1234Val, MLPA analysis                                                                                         |
| Spinal Muscular Atrophy                               | SMN1 and SMN2 dosage analysis + sequencing exons 7 & 8                                                                                                                                             |
| Deafness                                              | Connexin 26 (gap junction protein)                                                                                                                                                                 |
| Wilson Disease                                        | Full <i>ATP7B</i> exon sequencing + MLPA analysis                                                                                                                                                  |
| Achondroplasia                                        | 1138 G>A / 1138 G>C of <i>FGFR3</i> gene                                                                                                                                                           |
| Hypochondroplasia                                     | 1620C>A or 1620C>G of <i>FGFR3</i> gene                                                                                                                                                            |
| Craniosynostosis                                      | Mutation analysis of fibroblast growth factor receptor, <i>FGFR</i> 1,2,3                                                                                                                          |
| Homocystinuria                                        | Cystathionine $\beta$ -synthase ( <i>CBS</i> ) deficiency due to p.Arg336Cys and p.Asp234Asn. Also <i>CBS</i> sequencing of coding + exon-intron boundaries                                        |
| Hereditary Multiple Exostoses                         | Full sequencing of the <i>EXT1</i> , <i>EXT2</i> coding + exon-intron boundaries                                                                                                                   |
| Prader-Willi / Angelman Syndromes                     | Methylation analysis, <i>UBE3A</i> sequencing                                                                                                                                                      |
| Arterial tortuosity Syndrome                          | <i>SLC2A10</i> , p.Ser81Arg (c.243C>G)                                                                                                                                                             |
| Ehlers-Danlos Syndrome                                | <i>B4GALT7</i> , p.Arg270Cys (c.808C>T)                                                                                                                                                            |
| Hemoglobinopathies                                    | Variants of hemoglobin <i>Hbs</i> (Sickle Cell Anemia)<br>$\beta$ -thalassemia: full hemoglobin, beta sequencing (UTR's, exon & intron)<br>$\alpha$ -thalassemia: 3.7kb deletion and alpha T-Saudi |
| Thrombophilia                                         | Factor V Leiden<br>Prothrombin 20210 G>A<br><i>MTHFR</i> 677 C>T and 1298 A>C                                                                                                                      |
| Blood group genotyping                                | RhD genotyping (including heterozygosity testing)                                                                                                                                                  |
| Late infantile neuronal ceroid lipofuscinosis (LINCL) | Full <i>CLN</i> 5,6,8 sequencing of coding + exon-intron boundaries.                                                                                                                               |
| Male Infertility                                      | Y chromosome microdeletions                                                                                                                                                                        |
| Long QT syndrome                                      | Full <i>KCNQ1</i> sequencing of coding + exon-intron boundaries                                                                                                                                    |
| SRY/TDF analysis                                      | SRY / X / Y genotyping                                                                                                                                                                             |
| Patients infected with HCV                            | <i>IL28B</i> genotyping for pegIFN / RBV treatment decision making                                                                                                                                 |
| Philadelphia chromosome                               | Chronic Myelocytic Leukemia (major CML) & acute lymphocytic leukemia (minor ALL) BCR/ABL test - available in mid 2012                                                                              |
| RNA / DNA banking                                     | From blood                                                                                                                                                                                         |
| DNA banking                                           | From blood / buccal cells / tissue / Guthrie card / amniotic fluid / CVS / whole genome amplification                                                                                              |
| Tests upon request                                    | For most disorders with known mutation(s). For inquiries please contact the laboratory.                                                                                                            |

<sup>1</sup> List of genetic tests provided by the Molecular Genetics Laboratory of Hamad Medical Corporation in Doha Qatar. Shown is the disorder and for each disorder a list of genes and specific mutations tested. For premarital genetic screening, tests include Cystic Fibrosis (p.Ile1234Val), Homocystinuria (p.Arg336Cys) and Spinal Muscular Atrophy with follow ups for beta- and alpha-thalassemia. For prenatal genetic diagnosis, tests include beta-thalassemia; spinal muscular atrophy; trisomies 13, 18, 21; X/Y genotyping; RhD genotyping; cystic fibrosis and Ehlers-Danlos Syndrome.

**Supp. Table S2** is available as a separate Excel file under the Supporting Information for this article.

**Supp. Table S3. Review of Literature for Variants in Table 3**

**GJB2 p.Trp24Ter** – Gap junction protein, beta 2 (MIM# 121011), also known as connexin-26, functions in cell to cell channels with adherent cells.(Bruzzone et al., 1996) Mutations in GJB2 are associated with hereditary deafness (MIM# 220290). The GJB2 (c.286G>A) p.Trp24Ter variant (rs104894396) functions as an autosomal recessive previously identified in Pakistani and Indian families and in Spanish Gypsies.(Kelsell et al., 1997; Maheshwari et al., 2003; Alvarez et al., 2005) The GJB2 p.Trp24Ter variant was observed in the Q3 subpopulation. Autosomal recessive deafness was previously observed in other Arab populations.(Tadmouri et al., 2006l) [category - Auditory].

**F5 p.Arg534Gln** – Coagulation factor V (MIM# 612309), functions as a cofactor in the thrombinase complex; activated factor X requires calcium and activated factor V to convert prothrombin to thrombin.(Kane and Davie, 1986) A deficiency of F5 is associated with predisposition to hemorrhage, while some variants predispose to thrombosis. The F5 p.Arg506Gln variant (referred to in dbSNP as c.1601G>A, p.Arg534Gln, rs6025), observed only in the Q2 population, is the classic factor V Leiden variant that predisposes to thrombophilia (MIM# 188055). This variant is referred to as p.Arg534Gln or p.Arg506Gln, the numeric position discrepancy depends on inclusion of the 28 amino acid leader peptide.(Jenny et al., 1987) [category - Hematologic].

**HBB p.Glu6Val, p.Glu26Lys, and p.Glu121Gln** – Hemoglobin beta locus (MIM# 141900) encodes one of two polypeptides that combine to form adult hemoglobin (HbA). Three autosomal recessive disease variants were observed in the Qatari at the HBB locus, including p.Glu6Val (referred to in dbSNP as c.70A>T, p.Glu7Val, rs77121243) associated with sickle cell anemia (HbS; MIM# 603903), p.Glu26Lys (referred to in dbSNP as c.129G>A, p.Glu27Lys, rs33950507) associated with hemoglobin E beta-plus-thalassemia (MIM# 613985), and p.Glu121Gln (referred to in dbSNP as c.414C>G, p.Glu122Gln, rs33946267) associated with hemoglobin D Punjab. The single-position discrepancy for the three variants is due to the standard of counting the first methionine, a standard adopted after the variants were discovered. Hence the literature refers to Glu6Val but the database refers to Glu7Val; these are the same mutations.(Bender and Hobbs, 2012) The p.Glu6Val variant is the classic sickle cell anemia variant, the biochemical manifestation is sickle-shaped red blood cells, and the clinical manifestation is related to poor circulation and includes bone pain, fatigue, and

jaundice. Sickle cell anemia has been previously observed in the Q2 and Q3 subpopulations, and was previously observed in many other Arab population.(Tadmouri et al., 2006k) The Glu26Lys variant causes beta-plus-thalassemia, characterized biochemically an imbalance in globin chain production and abnormal erythropoiesis and characterized clinically by paleness, abnormal development and premature death. This variant was observed only in the Q3 subpopulation, and was not observed in 1000 Genomes. Hemoglobin D Punjab is the most common abnormal hemoglobin in Asia, consistent with it being observed in the Q2 subpopulation. The clinical manifestation is of atypical hemolytic anemia. [category - Hematologic].

**MPL p.Lys39Asn** - Myeloproliferative leukemia virus oncogene (MIM# 159530) encodes the receptor for thrombopoietin. Heterozygosity is associated with thrombocytosis (MIM# 601977) and homozygotes have severe thrombocytosis. This variant (c.162G>T, p.Lys39Asn, rs17292650) was found only in the Q3 population, consistent with the knowledge that it common in the African-American population. [category - Hematologic].

**MEFV p.Pro369Ser, p.Met694Val** – The Mediterranean fever protein (“pyrin”) (MIM# 249100) is expressed in leukocytes and functions in inflammation and host defense.(Centola et al., 2000) Mutations in MEFV cause Mediterranean fever, sometimes in association with systemic amyloidosis, as is the case with the common autosomal recessive (c.2120A>G) p.Met694Val variant (rs61752717), with renal failure as a common complication. The MEFV p.Met694Val variant was observed only in the Q2 subpopulation, and the (c.1145C>T) p.Pro369Ser variant (rs11466023) was observed only in the Q1 population. Familial Mediterranean fever has been previously observed in many other Arab populations.(Tadmouri et al., 2006j) [category - Hematologic].

**EVC p.Arg443Gln** – Elis-van Creveld (MIM# 604831) variants are the cause of Ellis-van Creveld syndrome (MIM# 225500), an autosomal recessive disorder associated with skeletal dysplasia characterized by short limbs, short ribs, postaxial polydactyly and dysplastic nails and teeth.(Ruiz-Perez et al., 2000) The EVC protein acts together with EVC2 as a positive regulator of the IHH (Indian Hedgehog) signaling pathway of the cartilage growth plate.(Ruiz-Perez et al., 2007) The (c.1512G>A) p.Arg443Gln variant (rs35953626), found in the Q2 and Q3 subpopulations, functions as an autosomal dominant.(Ruiz-Perez et al., 2000) Ellis-van Creveld Syndrome has been previously observed in other Arab populations.(Tadmouri et al., 2006i)-[category - Bone].

**TGIF p.Glu107Leu** – Transforming growth factor-beta-induced factor (MIM# 602630) is a homeobox protein with DNA-binding and transcription factor activity.(Bertolino et al., 1995) The (c.636A>T) p.Glu107Leu variant (rs28939693) is an autosomal recessive associated with holoprosencephaly (MIM# 142946). The TGIF1 p.Glu107Leu variant was specific for the Q1 subpopulation. Holoprosencephaly was previously observed in other Arab populations.(Tadmouri et al., 2006h) [category - Bone].

**WNT10A p.Phe228Ile** – Wingless-type mouse mammary tumor virus integration site family, member 10A (MIM# 606268), a member of the WNT gene family, is a secreted signaling molecule that binds to G protein coupled receptors with functions in development.(Rawadi and Roman-Roman, 2005) The (c.1145T>A) p.Phe228Ile variant (rs121908120) is an autosomal dominant associated with odontoonychodermal dysplasia,(Kantaputra and Sripathomsawat, 2011) with clinical manifestation including anomalous teeth, skin, hair and nails. The WNT10A p.Phe228Ile variant was found only in the Q1 subpopulation. [category - Bone].

**ABCA4 p.Val931Met** – ATP-binding cassette, subfamily A, member 4 (MIM# 601691) is a member of the ATP-binding cassette superfamily transmembrane protein expressed exclusively in retinal photoreceptors involved in clearance of all-trans-retinal aldehyde, a byproduct of the retinoid cycle of vision. The (c.2895G>A) p.Val931Met variant (rs58331765), associated with Stargardt macular dystrophy (MIM# 248200), was observed only in the Q3 subpopulation. Stargardt disease has been previously observed in other Arab populations.(Tadmouri et al., 2006g) [category - Eye].

**CERKL p.Arg257Ter** – ceramide kinase-like (MIM# 608381) converts the sphingolipid metabolite ceramide into ceramide 1-phosphate, a key product related to cell apoptosis and survival. The (c.870C>T) p.Arg257Ter variant (rs121909398) is associated with autosomal recessive retinitis pigmentosa (MIM# 608380). The p.Arg257Ter variant prematurely truncates the protein within the predicted catalytic domain. This variant was found only in the Q2 subpopulation. [category - Eye].

**CYP1B1 p.Arg368His** – Cytochrome p450, subfamily I, polypeptide I (MIM# 601771) functions to metabolize steroid hormones and is expressed during eye development.(Vasiliou and Gonzalez, 2008) The (c.1506G>A) p.Arg368His variant (rs79204362) is linked to primary congenital glaucoma

(MIM# 231300) in Saudi Arabians.(Bejjani et al., 2000) It is also observed in a digenic form of juvenile-onset glaucoma, in combination with mutations in MYOC.(Vincent et al., 2002) Primary congenital glaucoma was previously observed in other Arab populations.(Tadmouri et al., 2006f) [category - Eye].

**RP1 p.Thr373Ile** – Oxygen-regulated photoreceptor protein 1 (MIM# 603937) is a microtubule-binding protein expressed in retinal photoreceptors.(Liu et al., 2002) Variants of RP1 are associated with retinitis pigmentosa (MIM# 180100). Most RP1 variants function mostly as autosomal dominants, but the (c.1266C>T) p.Thr373Ile variant (rs77775126) has been described as an autosomal recessive disorder in 2 consanguineous Pakistani families. Consistent with this, the RP1 p.Thr373Ile variant was specific for the Q2 subpopulation in the 100 Qatari exomes, and also observed at 0.015 prevalence in the validation cohort of Q1. [category - Eye].

**CAV3 p.Thr78Met** – Caveolin 3 (MIM# 601253) is a caveolin family member that functions as a component of caveolae plasma membranes.(Minetti et al., 1998) The (c.310C>A) p.Thr78Met variant (rs72546668) functions as an autosomal dominant that causes long QT syndrome 9 (MIM# 611818).(Vatta et al., 2006) The CAV3 p.Thr78Met variant was found in the Q1 and Q2 subpopulations. [category - Cardiovascular].

**NKX2-5 p.Arg25Cys** – Homeobox protein NKX -2.5 (MIM# 600584) plays a role in cardiac development. The (c.302C>T) p.Arg25Cys variant (rs28936670) is inherited as an autosomal recessive associated variably with tetralogy of Fallot, interrupted aortic arch, truncus arteriosus, hypoplastic left heart and valvular defects (MIM# 187500). The NKX-2.5 p.Arg25Cyl variant was found in the Q1 and Q3 subpopulations. Tetralogy of Fallot was previously observed in other Arab populations.(Tadmouri et al., 2006e) [category - Cardiovascular].

**SLC2A10 p.Ser81Arg** – Solute carrier family 2 (facilitated glucose transporter), member 10 (MIM# 606145) is a member of the glucose transporter family.(McVie-Wylie et al., 2001) The (c.340C>G) p.Ser81Arg variant (rs121908120) is an autosomal recessive associated with the arterial tortuosity syndrome (MIM# 208050), previously described in 10 Qatari, 8 in the same Bedouin tribes (e.g., likely Q1)(Faiyaz-Ul-Haque et al., 2008). Consistent with this, the SLC2A10 p.Ser81Arg variant was specific for the Q1 subpopulation. Arterial tortuosity was previously reported in Qatar and other Arab



populations.(Tadmouri et al., 2006d) [category - Cardiovascular].

**NCF2 p.Arg395Trp** – Neutrophil cytosolic factor 2 (MIM# 608515), also referred to as “p67-phox” for “phagocyte oxidase”, is a component of the NADPH oxidase complex. The (c.1458C>T) p.Arg395Trp variant (rs13306575) has been associated with autosomal recessive chronic granulomatous disease (MIM# 233710). This was found only in the Q3 subpopulation. Autosomal recessive chronic granulomatous disease has been previously observed in other Arab populations.(Tadmouri et al., 2006c) [category - Inflammatory].

**NLRP12 p.Arg284Ter** – NLR family, pyrin domain containing 12 (MIM# 609648) implicated in the activation of proinflammatory caspases as part of the inflammasome complex.(Tschopp et al., 2003) NLRP12 has a N-terminal pyrin domain.(Pinheiro et al., 2011) The (c.1070C>T) p.Arg284Ter variant (rs104895564) is an autosomal recessive associated with cold autoinflammatory syndrome-2 (MIM# 611762), with episodic fever, arthralgias, myalgias, and urticaria triggered by cold exposure.(Jeru et al., 2008) The NLRP12 p.Arg284Ter variant was found only in the Q3 population. [category -Inflammatory]

**NLRP3 p.Val198Met** – NLR family, pyrin domain-containing 3 (MIM# 606416) encodes a pyrin-like protein expressed predominantly in blood leukocytes. The (c.1344G>A) p.Val198Met variant (rs121908147) is linked to familial cold autoinflammatory syndrome (MIM# 120100). [category – Inflammatory].

**MASP2 p.Asp105Gly** – Mannan-binding lectin serine protease 2 (MIM# 605102) plays a role in innate immunity in an antibody-independent pathway by the MASP2 protein binding to carbohydrates, resulting in complement activation. Homozygote inheritance of the (c.380A>G) p.Asp105Gly variant (rs72550870) leads to MASP2 deficiency (MIM# 613791), and is associated with frequent infections, chronic inflammatory disease and pulmonary fibrosis. [category - Immunity].

**SLC7A9 p.Ala182Thr** – Solute carrier family 7 (cationic amino acid transporter, y+ system), member 9 (MIM# 604144) is a cationic amino acid transporter that functions in the reabsorption of cysteine in the kidney tubules.(Mattoo and Goldfarb, 2008) The (c.661G>A) p.Ala182Thr variant

(rs79389353) is an autosomal recessive associated with mild cystinuria (MIM# 220100) and kidney stones, first described in 4 Spanish patients and 1 Italian patient.(Feliubadalo et al., 1999) The SLC7A9 p.Ala182Thr variant was specific for the Q2 subpopulation. Cystinuria was previously observed in other Arab populations.(Tadmouri et al., 2006b) [category - Kidney].

**CIRH1A p.Arg565Trp** –Cirhin (MIM# 607456) binds to the zinc-finger protein cirip; together they bind to NF-KB promoter regulatory sequences.(Yu et al., 2009) Homozygosity of the (c.1789C>T) p.Arg565Trp variant (rs119465999) weakens cirhin-cirip binding and is associated with North American Indian childhood cirrhosis (MIM# 604901), a severe autosomal recessive intrahepatic cholestasis(Chagnon et al., 2002) observed in the Ojibway-Cree tribe of Quebec.(Chagnon et al., 2002) [category –Liver].

**CTNS p.Val42Ile** – Cystinosin (MIM# 606272) is a lysosomal membrane protein strongly expressed in pancreas, kidney and skeletal muscle.(Taranta et al., 2012) The (c.594G>A) p.Val42Ile variant (rs35086888) is associated with a mild form of cystinosis (MIM# 219800). In its most severe form, cystinosis is characterized by proximal renal tubulopathy and end stage renal disease in infants due to intra-lysosomal accumulation of cysteine.(Schnaper et al., 1992) The p.Val42Ile variant is localized in the N-terminus of the protein and partially alters CTNS transport capacity. Given the mild severity of the phenotype, this disease is classified as recessive. Nephropathic cystinosis has been previously observed in other Arab populations.(Tadmouri et al., 2006m) [category - Metabolic].

**KLF11 p.Thr220Met** – Kruppel-like factor 11 (MIM# 603301) is a transcription factor enriched in the pancreas.(Niu et al., 2007) The (c.821C>T) p.Thr220Met variant (rs34336420) functions as an autosomal dominant associated with maturity-onset diabetes of the young, type 7 (MODY7; MIM# 610508). The variant was found in the Q2 and Q3 populations. Both of the Qatari heterozygous for this variant were diagnosed with type-2 diabetes. [category - Metabolic]

**LPL p.Asp9Asn** – Lipoprotein lipase (MIM# 609708) is the p.Asp9Asn variant (referred to in dbSNP as c.476G>A, p.Asp36Asn, rs1801177) linked to familial combined hyperlipidemia (MIM# 144250) in an autosomal dominant inheritance mode. In a study of the Dutch population all carriers of the p.Asp9Asn variant had elevated levels of cholesterol, apoB, and triglycerides. [category - Metabolic].

**FECH p.Met267Ile and p.Gly55Cys** – Ferrochelatase (heme synthetase) (MIM# 612386) is an enzyme that catalyzes the terminal step in the biosynthesis of heme, catalyzing the insertion of iron into protoporphyrin IX converting into heme.(Dailey, 2002) Mutations of FECH, such as the (c.918G>A) p.Met267Ile (rs118204037) and the (c.280G>T) p.Gly55Cys (rs3848519) variants, are associated as autosomal recessives with erythropoietic protoporphyria (MIM# 177000), a disease characterized by elevated protoporphyrin levels in red blood cells and photosensitivity to visible light. The FECH p.Met267Ile variant was observed only in the Q1 subpopulation. [category - Metabolic].

**TYR p.Pro406Leu** – Tyrosinase (MIM# 606933) catalyzes the oxidation of tyrosine forming melanin.(Hearing and Ekel, 1976) Like other TYR mutations, the (c.1299C>T) p.Pro406Leu (rs104894313) variant of TYR causes type I oculocutaneous albinism (MIM# 606952). The p.Pro406Leu variant has been previously reported in the Amish population.(Tripathi et al., 1992) In the Qataris, it was observed only in the Q2 population. Oculocutaneous albinism (MIM# 203100) has been previously observed in Qatar and in other Arab populations.(Tadmouri et al., 2006n) [category - Metabolic].

**UPB1 p.Ala85Glu** – Beta-ureidopropionase (MIM# 606673) catalyzes the last step in pyrimidine degradation. The (c.375C>A) p.Ala85Glu variant (rs34035085) is associated in an autosomal recessive mode with beta-ureidopropionase deficiency (MIM# 613161), a malfunction of the pyrimidine degradation pathway that affects cleavage of N-carbamyl-beta-alanine and results in convulsive crises and physical collapse. [category - Metabolic].

**DYSF p.Ile1298Val** – Dysferlin (MIM# 603009) is a member of the family of genes coding for transmembrane proteins related to calcium-dependent membrane fusion events; dysferlin plays a role in muscle fiber repair. The (c.4268A>G) p.Ile1298Val variant (rs121908954) is associated with Miyoshi myopathy (MIM# 254130), limb girdle type 2B muscular dystrophy. The p.Ile1298Val variant was observed as a compound heterozygote with p.Arg2042Cys, and is classified as an autosomal recessive.(Liu et al., 1998) Myoshi myopathy has been previously observed in other Arab populations.(Tadmouri et al., 2006a) [category - Muscular].

**POMGT1 p.Asp556Asn** – Protein O-mannose beta-1,2-N-acetylglucosaminyltransferase (MIM# 606822) participates in O-mannosyl glycan synthesis. The (c.1666G>A) p.Asp556Asn variant (rs74374973) is an autosomal recessive associated with limb-girdle type C3 muscular dystrophy-dystroglycanopathy (MIM# 613157). [category - Muscular].

**AGTR2 p.Arg324Gln** – Angiotensin II receptor, type 2 (MIM# 300034) is one of 2 major receptors for the blood pressure regulation hormone angiotensin. ARG2 is primarily expressed in brain and adrenal medulla, and functions to mediate programmed cell death.(Yamada et al., 1996) The (c.1178G>A) p.Arg324Gln variant (rs35474657) is associated with mental retardation in an X-linked inheritance mode (MIM# 300852). The variant and phenotype was observed only in males,(Vervoort et al., 2002) and in Qatari was observed in a Q3 female in the heterozygous state. [category – Neurologic].

**RNASEH2C p.Arg69Trp** – subunit C of the ribonuclease H2 complex (MIM# 610330) which cleaves ribonucleotides from RNA:DNA duplexes. The (c.385C>T) p.Arg69Trp variant (rs78635798) is an autosomal recessive associated with Aicardi-Goutieres syndrome 3 (MIM# 610329), an encephalopathy that manifests as calcification of basal ganglia, lymphocytosis of the cerebrospinal fluid, and abnormal white matter.(Crow et al., 2006) This variant has been previously described in Pakistani families, consistent with Qatari specificity within the Q2 population. [category - Neurologic].

**BMP15 p.Ala180Thr** – Bone morphogenetic protein 15 (MIM# 300247) is a growth factor expressed in oocytes during follicular development.(Otsuka et al., 2000) The (c.587G>A) p.Ala180Thr variant (rs104894767) is an X-linked dominant associated with premature ovarian failure (MIM# 300510). The disease allele was previously observed in the heterozygous state in Indian women, consistent with presence in the Q2 population. [category - Reproductive].

**POF1B p.Arg329Gln** – Actin binding protein (MIM# 300603) The (c.1132G>A) p.Arg329Gln variant (rs75398746) is an X-linked recessive associated with premature ovarian failure (MIM# 300604). The variant was previously observed in the homozygous state in Lebanese women, consistent with presence in the Q1 population. [category - Reproductive]

**Supp. Table S4. OMIM + HGMD Variants Excluded<sup>1</sup>**

| <b>Gene</b> | <b>Amino acid change<sup>2</sup></b> | <b>DbSNP rsID</b> | <b>Disease allele frequency in Qatar<sup>3</sup></b> | <b>Reason for exclusion<sup>4</sup></b>            |
|-------------|--------------------------------------|-------------------|------------------------------------------------------|----------------------------------------------------|
| ABCA1       | p.Arg219Lys                          | rs2230806         | 0.475                                                | Greater than 5% disease allele frequency in Qatari |
| ABCA4       | p.Gly1961Glu                         | rs1800553         | 0.025                                                | Association / risk / susceptibility variant        |
| ABCA4       | p.Arg943Gln                          | rs1801581         | 0.010                                                | Association / risk / susceptibility variant        |
| ABCB1       | 3435C-T                              | rs1045642         | *                                                    | Disease allele unclear                             |
| ABCC6       | p.Arg1268Gln                         | rs2238472         | 0.165                                                | Greater than 5% disease allele frequency in Qatari |
| ACADS       | p.Gly185Ser                          | rs1799958         | 0.258                                                | Greater than 5% disease allele frequency in Qatari |
| ACADVL      | p.Pro65Leu                           | rs28934585        | 0.025                                                | Compound with other variants in cases              |
| ADA         | p.Lys80Arg                           | rs11555566        | 0.130                                                | Greater than 5% disease allele frequency in Qatari |
| ADRB2       | p.Gln27Glu                           | rs1042714         | 0.261                                                | Greater than 5% disease allele frequency in Qatari |
| ADRB2       | p.Thr164Ile                          | rs1800888         | 0.010                                                | Molecular basis not known for phenotype            |
| AGT         | p.Met235Thr                          | rs699             | 0.612                                                | Greater than 5% disease allele frequency in Qatari |
| AGTR2       | *                                    | rs12917810        | *                                                    | SNPEFF and HGMD disagree                           |
| ALAD        | p.Lys59Asn                           | rs1800435         | 0.085                                                | Greater than 5% disease allele frequency in Qatari |
| AMPD1       | p.Gln12Ter                           | rs17602729        | 0.026                                                | Compound with other variants in cases              |
| ANK2        | p.Leu1622Ile                         | rs35530544        | 0.010                                                | Observed in controls                               |
| APC         | p.Glu1317Gln                         | rs1801166         | 0.020                                                | Molecular basis not known for phenotype            |
| APOC2       | p.Lys55Gln                           | rs5126            | 0.010                                                | Polymorphism with no known functional impact       |
| APOC2       | p.Glu38Lys                           | rs5122            | 0.005                                                | Molecular basis not known for phenotype            |
| APOC3       | p.Arg19Ter                           | rs76353203        | 0.005                                                | Association / risk / susceptibility variant        |
| ASPA        | p.Tyr231Ter                          | rs12948217        | *                                                    | Disease allele unclear                             |
| ATM         | p.Met1040Val                         | rs3092857         | 0.005                                                | Somatic mutation in cancer                         |
| ATP6V0A4    | p.Met580Thr                          | rs3807153         | 0.202                                                | Greater than 5% disease allele frequency in Qatari |
| ATP8B1      | p.Asp70Asn                           | rs34719006        | 0.027                                                | Observed in controls                               |
| BBS1        | p.Glu234Lys                          | rs35520756        | 0.020                                                | Compound with other variants in cases              |
| BBS2        | p.Asn70Ser                           | rs4784677         | 0.005                                                | Snpeff and OMIM disagree                           |
| BCHE        | p.Ala539Thr                          | rs1803274         | 0.197                                                | Greater than 5% disease allele frequency in Qatari |
| BCHE        | p.Asp70Gly                           | rs1799807         | 0.005                                                | Molecular basis not known for phenotype            |
| BCHE        | p.Gly390Val                          | rs28933390        | 0.005                                                | Molecular basis not known for phenotype            |

| <b>Gene</b> | <b>Amino acid change<sup>2</sup></b> | <b>DbSNP rsID</b> | <b>Disease allele frequency in Qatar<sup>3</sup></b> | <b>Reason for exclusion<sup>4</sup></b>            |
|-------------|--------------------------------------|-------------------|------------------------------------------------------|----------------------------------------------------|
| BDNF        | p.Val66Met                           | rs6265            | 0.125                                                | Greater than 5% disease allele frequency in Qatari |
| BDNF        | p.Thr2Ile                            | rs8192466         | 0.010                                                | Observed in controls                               |
| BMP4        | p.Arg287His                          | rs121912768       | 0.005                                                | Modifier not causative                             |
| BRCA2       | p.Asn372His                          | rs144848          | 0.361                                                | Greater than 5% disease allele frequency in Qatari |
| BTD         | p.Ala171Thr                          | rs13078881        | *                                                    | Disease allele unclear                             |
| BUB1B       | p.Thr40Met                           | rs56079734        | 0.005                                                | Somatic mutation in cancer                         |
| C1GALT1C1   | p.Asp131Glu                          | rs17261572        | 0.101                                                | Greater than 5% disease allele frequency in Qatari |
| C2          | p.Glu318Asp                          | rs9332739         | 0.040                                                | Association / risk / susceptibility variant        |
| C3          | p.Leu314Pro                          | rs1047286         | 0.890                                                | Greater than 5% disease allele frequency in Qatari |
| C3          | p.Arg102Gly                          | rs2230199         | 0.145                                                | Greater than 5% disease allele frequency in Qatari |
| C8B         | p.Arg374Ter                          | rs41286844        | 0.005                                                | Compound with other variants in cases              |
| CA2         | p.Asn252Asp                          | rs2228063         | 0.017                                                | Insufficient evidence to determine causality       |
| CASP8       | p.Asp302His                          | rs1045485         | 0.065                                                | Greater than 5% disease allele frequency in Qatari |
| CASR        | p.Ala986Ser                          | rs1801725         | 0.265                                                | Greater than 5% disease allele frequency in Qatari |
| CAV3        | p.Asn33Lys                           | rs1008642         | *                                                    | Disease allele unclear                             |
| CAV3        | p.Gly56Ser                           | rs72546667        | 0.010                                                | Conflicting reports in literature                  |
| CETP        | p.Ile405Val                          | rs5882            | 0.460                                                | Greater than 5% disease allele frequency in Qatari |
| CFH         | *                                    | rs2274700         | *                                                    | Disease allele unclear                             |
| CFH         | p.Ile62Val                           | rs800292          | 0.714                                                | Greater than 5% disease allele frequency in Qatari |
| CFH         | p.Tyr402His                          | rs1061170         | 0.305                                                | Greater than 5% disease allele frequency in Qatari |
| CFTR        | p.Met470Val                          | rs213950          | 0.416                                                | Greater than 5% disease allele frequency in Qatari |
| CLEC7A      | p.Tyr238Ter                          | rs16910526        | 0.040                                                | Association / risk / susceptibility variant        |
| CLN6        | p.Glu72Ter                           | rs104894483       | *                                                    | Disease allele unclear                             |
| CPN1        | p.Gly178Asp                          | rs61751507        | 0.060                                                | Greater than 5% disease allele frequency in Qatari |
| CPOX        | p.Arg447Cys                          | rs28931603        | 0.005                                                | Insufficient evidence to determine causality       |
| CTH         | *                                    | rs1021737         | *                                                    | Disease allele unclear                             |
| CTH         | p.Thr67Ile                           | rs28941785        | 0.005                                                | Insufficient evidence to determine causality       |
| CYB5R3      | p.Thr117Ser                          | rs1800457         | 0.065                                                | Greater than 5% disease allele frequency in Qatari |
| CYBA        | p.His72Tyr                           | rs4673            | 0.429                                                | Greater than 5% disease allele frequency in Qatari |

| Gene    | Amino acid change <sup>2</sup> | DbSNP rsID  | Disease allele frequency in Qatar <sup>3</sup> | Reason for exclusion <sup>4</sup>                       |
|---------|--------------------------------|-------------|------------------------------------------------|---------------------------------------------------------|
| CYP11B2 | p.Arg181Trp                    | rs61757294  | *                                              | Disease allele unclear                                  |
| CYP2A6  | p.Leu160His                    | rs1801272   | 0.041                                          | Association / risk / susceptibility variant             |
| CYP2C19 | p.Trp212Ter                    | rs4986893   | 0.010                                          | Drug metabolism variant not linked to disease           |
| CYP2C9  | p.Arg144Cys                    | rs1799853   | 0.122                                          | Greater than 5% disease allele frequency in Qatari      |
| CYP2C9  | p.Ile359Leu                    | rs1057910   | 0.015                                          | Drug metabolism variant not linked to disease           |
| DBT     | p.Gly323Ser                    | rs12021720  | 0.160                                          | Greater than 5% disease allele frequency in Qatari      |
| DMD     | p.His2921Arg                   | rs1800279   | 0.036                                          | Insufficient evidence to determine causality            |
| DMD     | p.Asn2912Asp                   | rs1800278   | 0.025                                          | Compound with other variants in cases                   |
| DMD     | p.Glu2910Val                   | rs41305353  | 0.025                                          | Compound with other variants in cases                   |
| DPYD    | p.Cys29Arg                     | rs1801265   | 0.276                                          | Greater than 5% disease allele frequency in Qatari      |
| EDAR    | p.Val370Ala                    | rs3827760   | 0.015                                          | Association / risk / susceptibility variant             |
| EIF2B2  | p.Arg183Ter                    | rs104894427 | 0.005                                          | Compound with other variants in cases                   |
| ENPP1   | p.Lys121Gln                    | rs1044498   | 0.290                                          | Greater than 5% disease allele frequency in Qatari      |
| ENPP1   | p.Arg774Cys                    | rs28933977  | 0.025                                          | Reclassified by OMIM as variant of unknown significance |
| EPHX1   | p.Tyr113His                    | rs1051740   | 0.278                                          | Greater than 5% disease allele frequency in Qatari      |
| EPHX1   | p.His139Arg                    | rs2234922   | 0.155                                          | Greater than 5% disease allele frequency in Qatari      |
| ERBB2   | p.Val655Ile                    | rs1136201   | 0.867                                          | Greater than 5% disease allele frequency in Qatari      |
| F12     | *                              | rs1801020   | *                                              | Disease allele unclear                                  |
| F13A1   | p.Val34Leu                     | rs5985      | 0.151                                          | Greater than 5% disease allele frequency in Qatari      |
| F13B    | p.His95Arg                     | rs6003      | 0.190                                          | Greater than 5% disease allele frequency in Qatari      |
| FAH     | p.Arg341Trp                    | rs11555096  | 0.011                                          | Molecular basis not known for phenotype                 |
| FBN2    | p.Val964Ile                    | rs154001    | 0.720                                          | Greater than 5% disease allele frequency in Qatari      |
| FGB     | p.Arg448Lys                    | rs4220      | 0.145                                          | Greater than 5% disease allele frequency in Qatari      |
| FKTN    | p.Gly125Ser                    | rs34006675  | 0.035                                          | Reclassified by OMIM as variant of unknown significance |
| FMO3    | p.Val257Met                    | rs1736557   | 0.117                                          | Greater than 5% disease allele frequency in Qatari      |
| FMO3    | p.Glu308Gly                    | rs2266780   | 0.050                                          | Greater than 5% disease allele frequency in Qatari      |
| FSHR    | p.Thr307Ala                    | rs6165      | 0.546                                          | Greater than 5% disease allele frequency in Qatari      |
| FSHR    | p.Asn680Ser                    | rs6166      | 0.444                                          | Greater than 5% disease allele frequency in Qatari      |
| FUCA1   | p.Gln281Arg                    | rs13551     | 0.192                                          | Greater than 5% disease allele frequency in Qatari      |

| <b>Gene</b> | <b>Amino acid change<sup>2</sup></b> | <b>DbSNP rsID</b> | <b>Disease allele frequency in Qatar<sup>3</sup></b> | <b>Reason for exclusion<sup>4</sup></b>            |
|-------------|--------------------------------------|-------------------|------------------------------------------------------|----------------------------------------------------|
| FUT6        | p.Glu247Lys                          | rs17855739        | 0.144                                                | Greater than 5% disease allele frequency in Qatari |
| G6PD        | p.Ser188Phe                          | rs5030868         | 0.025                                                | Compound with other variants in cases              |
| G6PD        | p.Val68Met                           | rs1050828         | 0.021                                                | Modifier not causative                             |
| GALT        | p.Leu218Leu                          | rs2070075         | *                                                    | Disease allele unclear                             |
| GALT        | p.Asn314Asp                          | rs2070074         | 0.075                                                | Greater than 5% disease allele frequency in Qatari |
| GCNT2       | p.Ala169Thr                          | rs56106312        | 0.005                                                | Gene not expressed in disease tissue               |
| GDNF        | p.Arg93Trp                           | rs36119840        | 0.005                                                | Molecular basis not known for phenotype            |
| GHR         | p.Leu526Ile                          | rs6180            | 0.541                                                | Greater than 5% disease allele frequency in Qatari |
| GIF         | p.Gln5Arg                            | rs35211634        | 0.091                                                | Greater than 5% disease allele frequency in Qatari |
| GJB2        | p.Met34Thr                           | rs35887622        | 0.005                                                | Observed in controls                               |
| GLA         | p.Asp313Tyr                          | rs28935490        | 0.005                                                | Molecular basis not known for phenotype            |
| GNPTG       | *                                    | rs193302860       | 0.005                                                | Snpeff and HGMD disagree                           |
| H6PD        | p.Arg453Gln                          | rs6688832         | 0.280                                                | Greater than 5% disease allele frequency in Qatari |
| HBB         | p.His143Gln                          | rs36020563        | *                                                    | Disease allele unclear                             |
| HBB         | p.His2Gln                            | rs713040          | *                                                    | Disease allele unclear                             |
| HEXB        | p.Lys121Arg                          | rs11556045        | 0.122                                                | Greater than 5% disease allele frequency in Qatari |
| HFE         | p.His63Asp                           | rs1799945         | 0.108                                                | Greater than 5% disease allele frequency in Qatari |
| HFE         | p.Val53Met                           | rs28934889        | 0.005                                                | Molecular basis not known for phenotype            |
| HPD         | p.Ala33Thr                           | rs1154510         | 0.095                                                | Greater than 5% disease allele frequency in Qatari |
| HR          | p.Thr1022Ala                         | rs7014851         | 0.085                                                | Greater than 5% disease allele frequency in Qatari |
| HSD17B4     | p.Arg106Pro                          | rs25640           | *                                                    | Disease allele unclear                             |
| HTRA2       | p.Gly399Ser                          | rs72470545        | 0.005                                                | Observed in controls                               |
| IL10RB      | p.Glu47Lys                           | rs2834167         | 0.645                                                | Greater than 5% disease allele frequency in Qatari |
| IL7R        | p.Ile138Val                          | rs1494555         | 0.374                                                | Greater than 5% disease allele frequency in Qatari |
| INSR        | p.Val985Met                          | rs1799816         | 0.025                                                | Observed in controls                               |
| ITGB3       | p.Leu33Pro                           | rs5918            | 0.167                                                | Greater than 5% disease allele frequency in Qatari |
| KCNE2       | p.Gln9Glu                            | rs16991652        | 0.010                                                | Association / risk / susceptibility variant        |
| KCNE2       | p.Ile57Thr                           | rs74315448        | 0.010                                                | Genotype of cases not specified                    |
| KCNJ11      | p.Glu23Lys                           | rs5219            | 0.210                                                | Greater than 5% disease allele frequency in Qatari |



| <b>Gene</b> | <b>Amino acid change<sup>2</sup></b> | <b>DbSNP rsID</b> | <b>Disease allele frequency in Qatar<sup>3</sup></b> | <b>Reason for exclusion<sup>4</sup></b>                 |
|-------------|--------------------------------------|-------------------|------------------------------------------------------|---------------------------------------------------------|
| KDR         | p.Cys482Arg                          | rs34231037        | 0.030                                                | Observed in controls                                    |
| KLKB1       | p.Asn124Ser                          | rs3733402         | 0.540                                                | Greater than 5% disease allele frequency in Qatari      |
| LEPR        | p.Lys656Asn                          | rs8179183         | 0.208                                                | Greater than 5% disease allele frequency in Qatari      |
| LEPR        | p.Lys109Arg                          | rs1137100         | 0.105                                                | Greater than 5% disease allele frequency in Qatari      |
| LIG4        | p.Thr9Ile                            | rs1805388         | 0.075                                                | Greater than 5% disease allele frequency in Qatari      |
| LIG4        | p.Ala3Val                            | rs1805389         | 0.020                                                | Association / risk / susceptibility variant             |
| LPL         | p.Asp250Asn                          | rs118204068       | 0.005                                                | Compound with other variants in cases                   |
| LRP5        | p.Val667Met                          | rs4988321         | 0.082                                                | Greater than 5% disease allele frequency in Qatari      |
| MECP2       | p.Gly428Ser                          | rs61753971        | 0.005                                                | Insufficient evidence to determine causality            |
| MEFV        | p.Pro369Ser                          | rs11466023        | 0.010                                                | Reclassified by OMIM as variant of unknown significance |
| MEFV        | p.Arg408Gln                          | rs11466024        | 0.010                                                | Reclassified by OMIM as variant of unknown significance |
| MLH3        | p.Val741Phe                          | rs28756990        | 0.020                                                | Observed in controls                                    |
| MSR1        | p.Asp174Tyr                          | rs72552387        | 0.010                                                | Observed in controls                                    |
| MTHFR       | *                                    | rs1801131         | *                                                    | Disease allele unclear                                  |
| MTHFR       | *                                    | rs1801133         | *                                                    | Disease allele unclear                                  |
| MTP         | p.Ile128Thr                          | rs3816873         | 0.392                                                | Greater than 5% disease allele frequency in Qatari      |
| MTRR        | p.Ile22Met                           | rs1801394         | 0.392                                                | Greater than 5% disease allele frequency in Qatari      |
| MYO1A       | p.Gly662Glu                          | rs33962952        | 0.035                                                | Insufficient evidence to determine causality            |
| NDUFV2      | p.Ala29Val                           | rs906807          | 0.156                                                | Greater than 5% disease allele frequency in Qatari      |
| NOD2        | p.Gly908Arg                          | rs2066845         | 0.035                                                | Association / risk / susceptibility variant             |
| NPHS2       | p.Arg229Gln                          | rs61747728        | 0.005                                                | Association / risk / susceptibility variant             |
| NR3C1       | p.Asn363Ser                          | rs56149945        | 0.005                                                | Insufficient evidence to determine causality            |
| NTRK1       | p.Tyr604His                          | rs6336            | 0.967                                                | Greater than 5% disease allele frequency in Qatari      |
| OAT         | p.Asn378Asn                          | rs11461           | *                                                    | Disease allele unclear                                  |
| OCA2        | p.Arg305Trp                          | rs1800401         | 0.165                                                | Greater than 5% disease allele frequency in Qatari      |
| OPTN        | p.Met98Lys                           | rs11258194        | 0.055                                                | Greater than 5% disease allele frequency in Qatari      |
| OTC         | p.Lys46Arg                           | rs1800321         | 0.217                                                | Greater than 5% disease allele frequency in Qatari      |
| PARK2       | p.Ala82Glu                           | rs55774500        | 0.005                                                | Compound with other variants in cases                   |
| PARK7       | p.Asp149Ala                          | rs74315352        | 0.005                                                | Insufficient evidence to determine causality            |

| <b>Gene</b> | <b>Amino acid change<sup>2</sup></b> | <b>DbSNP rsID</b> | <b>Disease allele frequency in Qatar<sup>3</sup></b> | <b>Reason for exclusion<sup>4</sup></b>            |
|-------------|--------------------------------------|-------------------|------------------------------------------------------|----------------------------------------------------|
| PCSK1       | p.Asn221Asp                          | rs6232            | 0.050                                                | Greater than 5% disease allele frequency in Qatari |
| PHYH        | p.Pro29Ser                           | rs28938169        | 0.061                                                | Greater than 5% disease allele frequency in Qatari |
| PHKB        | p.Met185Ile                          | rs56257827        | 0.005                                                | Insufficient evidence to determine causality       |
| PI          | *                                    | rs6647            | *                                                    | Disease allele unclear                             |
| PI          | p.Glu376Asp                          | rs1303            | 0.258                                                | Greater than 5% disease allele frequency in Qatari |
| PI          | p.Arg101His                          | rs709932          | 0.185                                                | Greater than 5% disease allele frequency in Qatari |
| PLA2G7      | p.Ala379Val                          | rs1051931         | 0.175                                                | Greater than 5% disease allele frequency in Qatari |
| PLA2G7      | p.Ile198Thr                          | rs1805018         | 0.121                                                | Greater than 5% disease allele frequency in Qatari |
| PLA2G7      | p.Val279Phe                          | rs76863441        | 0.005                                                | Association / risk / susceptibility variant        |
| PLAU        | p.Pro141Leu                          | rs2227564         | 0.070                                                | Greater than 5% disease allele frequency in Qatari |
| PNP         | p.Ser51Gly                           | rs1049564         | *                                                    | Disease allele unclear                             |
| PPARG       | p.His449His                          | rs3856806         | *                                                    | Disease allele unclear                             |
| PPARG2      | p.Pro12Ala                           | rs1801282         | 0.045                                                | Association / risk / susceptibility variant        |
| PPP1R3      | p.Asp905Tyr                          | rs1799999         | 0.088                                                | Greater than 5% disease allele frequency in Qatari |
| PRNP        | p.Glu219Lys                          | rs1800014         | 0.015                                                | Association / risk / susceptibility variant        |
| PRNP        | p.Asn171Ser                          | rs16990018        | 0.010                                                | Association / risk / susceptibility variant        |
| PRODH       | p.Thr466Met                          | rs2870984         | 0.011                                                | Association / risk / susceptibility variant        |
| PTH         | p.Arg83Ter                           | rs6256            | *                                                    | Disease allele unclear                             |
| PTPRJ       | p.Gln276Pro                          | rs1566734         | 0.202                                                | Greater than 5% disease allele frequency in Qatari |
| RET         | p.Ala45Ala                           | rs1800858         | *                                                    | Disease allele unclear                             |
| RHAG        | p.Val270Ile                          | rs16879498        | 0.040                                                | Compound with other variants in cases              |
| RHCE        | p.Pro226Ala                          | rs609320          | 0.806                                                | Greater than 5% disease allele frequency in Qatari |
| RNASEL      | p.Arg462Gln                          | rs486907          | 0.235                                                | Greater than 5% disease allele frequency in Qatari |
| RP1         | p.Asn985Tyr                          | rs2293869         | 0.400                                                | Greater than 5% disease allele frequency in Qatari |
| RPGRIP1L    | p.Ala229Thr                          | rs61747071        | 0.070                                                | Greater than 5% disease allele frequency in Qatari |
| RPL5        | p.Gly140Ser                          | rs121434406       | 0.005                                                | Observed in controls                               |
| RYR1        | p.Arg2676Trp                         | rs35180584        | *                                                    | Disease allele unclear                             |
| SBDS        | *                                    | rs113993993       | *                                                    | Disease allele unclear                             |
| SCNN1A      | p.Trp493Arg                          | rs5742912         | 0.010                                                | Observed in controls                               |

| Gene     | Amino acid change <sup>2</sup> | DbSNP rsID  | Disease allele frequency in Qatar <sup>3</sup> | Reason for exclusion <sup>4</sup>                  |
|----------|--------------------------------|-------------|------------------------------------------------|----------------------------------------------------|
| SDHB     | p.Ser163Pro                    | rs33927012  | 0.005                                          | Genotype of cases not specified                    |
| SDHD     | p.Gly12Ser                     | rs34677591  | 0.010                                          | Molecular basis not known for phenotype            |
| SEMA4A   | p.Arg713Gln                    | rs41265017  | 0.065                                          | Greater than 5% disease allele frequency in Qatari |
| SERPINE1 | p.Ala15Thr                     | rs6092      | 0.060                                          | Greater than 5% disease allele frequency in Qatari |
| SLC45A2  | p.Phe374Leu                    | rs16891982  | 0.909                                          | Greater than 5% disease allele frequency in Qatari |
| SLC45A2  | p.Glu272Lys                    | rs26722     | 0.210                                          | Greater than 5% disease allele frequency in Qatari |
| SLC4A1   | p.Lys56Glu                     | rs5036      | 0.075                                          | Greater than 5% disease allele frequency in Qatari |
| SLC6A20  | p.Thr199Met                    | rs17279437  | 0.010                                          | Compound with other variants in cases              |
| SPINK1   | p.Asn34Ser                     | rs17107315  | 0.005                                          | Molecular basis not known for phenotype            |
| SPTA1    | p.Asp791Glu                    | rs7418956   | 0.010                                          | Observed in heterozygous state in cases            |
| STOX1    | p.Tyr153His                    | rs1341667   | 0.560                                          | Greater than 5% disease allele frequency in Qatari |
| TAP1     | p.Ile333Val                    | rs1057141   | 0.275                                          | Greater than 5% disease allele frequency in Qatari |
| TAP1     | p.Asp637Gly                    | rs1135216   | 0.255                                          | Greater than 5% disease allele frequency in Qatari |
| TBG      | p.Leu283Phe                    | rs1804495   | 0.078                                          | Greater than 5% disease allele frequency in Qatari |
| TBG      | p.Asp171Asn                    | rs1050086   | 0.010                                          | Insufficient evidence to determine causality       |
| TCN2     | p.Pro259Arg                    | rs1801198   | 0.550                                          | Greater than 5% disease allele frequency in Qatari |
| TF       | p.Pro570Ser                    | rs1049296   | 0.207                                          | Greater than 5% disease allele frequency in Qatari |
| TF       | p.Gly277Ser                    | rs1799899   | 0.080                                          | Greater than 5% disease allele frequency in Qatari |
| TG       | p.Met1027Val                   | rs853326    | 0.586                                          | Greater than 5% disease allele frequency in Qatari |
| TG       | p.Ser734Ala                    | rs180223    | 0.571                                          | Greater than 5% disease allele frequency in Qatari |
| TINF2    | p.Ser245Tyr                    | rs142777869 | 0.024                                          | Observed in controls                               |
| TLR4     | p.Thr399Ile                    | rs4986791   | 0.040                                          | Association / risk / susceptibility variant        |
| TLR4     | p.Asp299Gly                    | rs4986790   | 0.036                                          | Association / risk / susceptibility variant        |
| TNFRSF1A | p.Arg92Pro                     | rs4149584   | *                                              | Disease allele unclear                             |
| TNNI3    | p.Pro82Ser                     | rs77615401  | 0.011                                          | Modifier not causative                             |
| TOR1A    | p.Asp216His                    | rs1801968   | 0.130                                          | Greater than 5% disease allele frequency in Qatari |
| TPMT     | p.Tyr240Cys                    | rs1142345   | 0.010                                          | Insufficient evidence to determine causality       |
| TPMT     | p.Arg215His                    | rs56161402  | 0.005                                          | Molecular basis not known for phenotype            |
| TTR      | p.Gly6Ser                      | rs1800458   | 0.010                                          | Polymorphism with no known functional impact       |

| Gene    | Amino acid change <sup>2</sup> | DbSNP rsID | Disease allele frequency in Qatar <sup>3</sup> | Reason for exclusion <sup>4</sup>                  |
|---------|--------------------------------|------------|------------------------------------------------|----------------------------------------------------|
| TTR     | p.Val122Ile                    | rs76992529 | 0.005                                          | Association / risk / susceptibility variant        |
| TYR     | p.Arg402Gln                    | rs1126809  | 0.130                                          | Greater than 5% disease allele frequency in Qatari |
| TYR     | p.Ser192Tyr                    | rs1042602  | 0.072                                          | Greater than 5% disease allele frequency in Qatari |
| TYR     | p.Arg217Trp                    | rs63159160 | 0.005                                          | Compound with other variants in cases              |
| UGT1A1  | p.Gly71Arg                     | rs4148323  | 0.005                                          | Association / risk / susceptibility variant        |
| WFS1    | *                              | rs10010131 | *                                              | Disease allele unclear                             |
| WISP3   | p.Cys78Arg                     | rs17073260 | 0.985                                          | Greater than 5% disease allele frequency in Qatari |
| WRD36   | p.Ala449Thr                    | rs35703638 | 0.010                                          | Observed in controls                               |
| WRD36   | p.Asp658Gly                    | rs34595252 | 0.005                                          | Observed in controls                               |
| ZEB1    | p.Asn78Thr                     | rs80194531 | *                                              | Disease allele unclear                             |
| ZFP57   | p.Cys241Ter                    | rs61730328 | *                                              | Disease allele unclear                             |
| ZFYVE27 | p.Gly191Val                    | rs35077384 | 0.020                                          | Conflicting reports in literature                  |

<sup>1</sup> The exomes of 100 Qataris were sequenced, and variants present in dbSNP were annotated using OMIM (<http://omim.org>). Out of 251 variants that were linked to a record in the OMIM or HGMD database, the list was pruned down to 37 variants based on a combination of computational and manual filtering. Shown are the 214 excluded variants, including information on the gene, disease allele frequency in 100 Qatari exomes, and reason for exclusion.

<sup>2</sup> Amino acid substitution is shown for coding coding variants, with wild-type allele listed first, followed by polypeptide position and disease allele. (\*) indicates variant is non-coding, the amino acid substitution is not specified in the OMIM record, or multiple databases disagree on the coding function.

<sup>3</sup> Allele frequency is shown for the disease allele when the disease allele could be determined.

<sup>4</sup> Variants were excluded based on one or more of the listed reasons: greater than 5% disease allele frequency in qatari (n=95), disease allele unclear (n=27), association / risk / susceptibility variant (n=20), compound with other variants in cases (n=13), observed in controls (n=14), molecular basis not known for phenotype (n=12), insufficient evidence to determine causality (n=11), reclassified by OMIM as variant of unknown significance (n=4), conflicting reports in literature (n=2), drug metabolism variant not linked to disease (n=2), genotype of cases not specified (n=2), modifier not causative (n=3), polymorphism with no known functional impact (n=2), somatic mutation in cancer (n=2), gene not expressed in disease tissue (n=1), observed in heterozygous state in cases (n=1), SNPEFF and OMIM (or HGMD) disagree (n=3).

**Supp. References**

Alvarez A, del C, I, Villamar M, Aguirre LA, Gonzalez-Neira A, Lopez-Nevot A, Moreno-Pelayo MA, Moreno F. 2005. High prevalence of the W24X mutation in the gene encoding connexin-26 (GJB2) in Spanish Romani (gypsies) with autosomal recessive non-syndromic hearing loss. *Am J Med Genet A* 137A:255-258.

Bejjani BA, Stockton DW, Lewis RA, Tomey KF, Dueker DK, Jabak M, Astle WF, Lupski JR. 2000. Multiple CYP1B1 mutations and incomplete penetrance in an inbred population segregating primary congenital glaucoma suggest frequent de novo events and a dominant modifier locus. *Hum Mol Genet* 9:367-374.

Bender MA, Hobbs W. 2012. *Sickle Cell Disease*.

Bertolino E, Reimund B, Wildt-Perinic D, Clerc RG. 1995. A novel homeobox protein which recognizes a TGT core and functionally interferes with a retinoid-responsive motif. *J Biol Chem* 270:31178-31188.

Bruzzone R, White TW, Paul DL. 1996. Connections with connexins: the molecular basis of direct intercellular signaling. *Eur J Biochem* 238:1-27.

Centola M, Wood G, Frucht DM, Galon J, Aringer M, Farrell C, Kingma DW, Horwitz ME, Mansfield E, Holland SM, O'Shea JJ, Rosenberg HF, et al. 2000. The gene for familial Mediterranean fever, MEFV, is expressed in early leukocyte development and is regulated in response to inflammatory mediators. *Blood* 95:3223-3231.

Chagnon P, Michaud J, Mitchell G, Mercier J, Marion JF, Drouin E, Rasquin-Weber A, Hudson TJ, Richter A. 2002. A missense mutation (R565W) in cirhin (FLJ14728) in North American Indian childhood cirrhosis. *Am J Hum Genet* 71:1443-1449.

Crow YJ, Leitch A, Hayward BE, Garner A, Parmar R, Griffith E, Ali M, Semple C, Aicardi J, Babul-Hirji R, Baumann C, Baxter P, et al. 2006. Mutations in genes encoding ribonuclease H2 subunits cause Aicardi-Goutieres syndrome and mimic congenital viral brain infection. *Nat Genet* 38:910-916.

Dailey HA. 2002. Terminal steps of haem biosynthesis. *Biochem Soc Trans* 30:590-595.

Faiyaz-Ul-Haque M, Zaidi SH, Wahab AA, Eltohami A, Al-Mureikhi MS, Al-Thani G, Peltekova VD, Tsui LC, Teebi AS. 2008. Identification of a p.Ser81Arg encoding mutation in SLC2A10 gene of arterial tortuosity syndrome patients from 10 Qatari families. *Clin Genet* 74:189-193.

Feliubadalo L, Font M, Purroy J, Rousaud F, Estivill X, Nunes V, Golomb E, Centola M, Aksentijevich I, Kreiss Y, Goldman B, Pras M, et al. 1999. Non-type I cystinuria caused by mutations in SLC7A9, encoding a subunit (bo,+AT) of rBAT. *Nat Genet* 23:52-57.

Hearing VJ, Ekel TM. 1976. Mammalian tyrosinase. A comparison of tyrosine hydroxylation and melanin formation. *Biochem J* 157:549-557.

Jenny RJ, Pittman DD, Toole JJ, Kriz RW, Aldape RA, Hewick RM, Kaufman RJ, Mann KG. 1987. Complete cDNA and derived amino acid sequence of human factor V. *Proc Natl Acad Sci U S A* 84:4846-4850.

Jeru I, Duquesnoy P, Fernandes-Alnemri T, Cochet E, Yu JW, Lackmy-Port-Lis M, Grimprel E, Landman-Parker J, Hentgen V, Marlin S, McElreavey K, Sarkisian T, et al. 2008. Mutations in NALP12 cause hereditary periodic fever syndromes. *Proc Natl Acad Sci U S A* 105:1614-1619.

Kane WH, Davie EW. 1986. Cloning of a cDNA coding for human factor V, a blood coagulation factor homologous to factor VIII and ceruloplasmin. *Proc Natl Acad Sci U S A* 83:6800-6804.

Kantaputra P, Sripathomsawat W. 2011. WNT10A and isolated hypodontia. *Am J Med Genet A* 155A:1119-1122.

Kelsell DP, Dunlop J, Stevens HP, Lench NJ, Liang JN, Parry G, Mueller RF, Leigh IM. 1997. Connexin 26 mutations in hereditary non-syndromic sensorineural deafness. *Nature* 387:80-83.

Liu J, Aoki M, Illa I, Wu C, Fardeau M, Angelini C, Serrano C, Urtizberea JA, Hentati F, Hamida MB, Bohlega S, Culper EJ, et al. 1998. Dysferlin, a novel skeletal muscle gene, is mutated in Miyoshi myopathy and limb girdle muscular dystrophy. *Nat Genet* 20:31-36.

Liu Q, Zhou J, Daiger SP, Farber DB, Heckenlively JR, Smith JE, Sullivan LS, Zuo J, Milam AH, Pierce EA. 2002. Identification and subcellular localization of the RPI protein in human and mouse photoreceptors. *Invest Ophthalmol Vis Sci* 43:22-32.

Maheshwari M, Vijaya R, Ghosh M, Shastri S, Kabra M, Menon PS. 2003. Screening of families with autosomal recessive non-syndromic hearing impairment (ARNSHI) for mutations in GJB2 gene: Indian scenario. *Am J Med Genet A* 120A:180-184.

Mattoo A, Goldfarb DS. 2008. Cystinuria. *Semin Nephrol* 28:181-191.

McVie-Wylie AJ, Lamson DR, Chen YT. 2001. Molecular cloning of a novel member of the GLUT family of transporters, SLC2a10 (GLUT10), localized on chromosome 20q13.1: a candidate gene for NIDDM susceptibility. *Genomics* 72:113-117.

Minetti C, Sotgia F, Bruno C, Scartezzini P, Broda P, Bado M, Masetti E, Mazzocco M, Egeo A, Donati MA, Volonte D, Galbiati F, et al. 1998. Mutations in the caveolin-3 gene cause autosomal dominant limb-girdle muscular dystrophy. *Nat Genet* 18:365-368.

Niu X, Perakakis N, Laubner K, Limbert C, Stahl T, Brendel MD, Bretzel RG, Seufert J, Path G. 2007. Human Kruppel-like factor 11 inhibits human proinsulin promoter activity in pancreatic beta cells. *Diabetologia* 50:1433-1441.

Otsuka F, Yao Z, Lee T, Yamamoto S, Erickson GF, Shimasaki S. 2000. Bone morphogenetic protein-15. Identification of target cells and biological functions. *J Biol Chem* 275:39523-39528.

Pinheiro AS, Eibl C, Ekman-Vural Z, Schwarzenbacher R, Peti W. 2011. The NLRP12 pyrin domain: structure, dynamics, and functional insights. *J Mol Biol* 413:790-803.

Rawadi G, Roman-Roman S. 2005. Wnt signalling pathway: a new target for the treatment of osteoporosis. *Expert Opin Ther Targets* 9:1063-1077.

Ruiz-Perez VL, Blair HJ, Rodriguez-Andres ME, Blanco MJ, Wilson A, Liu YN, Miles C, Peters H, Goodship JA. 2007. Evc is a positive mediator of Ihh-regulated bone growth that localises at the base of chondrocyte cilia. *Development* 134:2903-2912.

Ruiz-Perez VL, Ide SE, Strom TM, Lorenz B, Wilson D, Woods K, King L, Francomano C, Freisinger P, Spranger S, Marino B, Dallapiccola B, et al. 2000. Mutations in a new gene in Ellis-van Creveld syndrome and Weyers acrorenal dysostosis. *Nat Genet* 24:283-286.

Schnaper HW, Cattel J, Merrill S, Marcusson E, Kissane JM, Shackelford GD, So SK, Nelson RD, Cole BR, Smith ML, . 1992. Early occurrence of end-stage renal disease in a patient with infantile nephropathic cystinosis. *J Pediatr* 120:575-578.

Tadmouri GO, Al Ali MT, Al-Haj AS, Al KN. 2006e. CTGA: the database for genetic disorders in Arab populations. *Nucleic Acids Res* 34:D602-D606.

Taranta A, Petrini S, Citti A, Boldrini R, Corallini S, Bellomo F, Levchenko E, Emma F. 2012. Distribution of cystinosis-LKG in human tissues. *Histochem Cell Biol* 138:351-363.

Tripathi RK, Strunk KM, Giebel LB, Weleber RG, Spritz RA. 1992. Tyrosinase gene mutations in type I (tyrosinase-deficient) oculocutaneous albinism define two clusters of missense substitutions. *Am J Med Genet* 43:865-871.

Tschopp J, Martinon F, Burns K. 2003. NALPs: a novel protein family involved in inflammation. *Nat Rev Mol Cell Biol* 4:95-104.

Vasiliou V, Gonzalez FJ. 2008. Role of CYP1B1 in glaucoma. *Annu Rev Pharmacol Toxicol* 48:333-358.

Vatta M, Ackerman MJ, Ye B, Makielski JC, Ughanze EE, Taylor EW, Tester DJ, Balijepalli RC, Foell JD, Li Z, Kamp TJ, Towbin JA. 2006. Mutant caveolin-3 induces persistent late sodium current and is associated with long-QT syndrome. *Circulation* 114:2104-2112.

Vervoort VS, Beachem MA, Edwards PS, Ladd S, Miller KE, de M, X, Clarkson K, DuPont B, Schwartz CE, Stevenson RE, Boyd E, Srivastava AK. 2002. AGTR2 mutations in X-linked mental retardation. *Science* 296:2401-2403.

Vincent AL, Billingsley G, Buys Y, Levin AV, Priston M, Trope G, Williams-Lyn D, Heon E. 2002. Digenic inheritance of early-onset glaucoma: CYP1B1, a potential modifier gene. *Am J Hum Genet* 70:448-460.



Yamada T, Horiuchi M, Dzau VJ. 1996. Angiotensin II type 2 receptor mediates programmed cell death. *Proc Natl Acad Sci U S A* 93:156-160.

Yu B, Mitchell GA, Richter A. 2009. Cirhin up-regulates a canonical NF-kappaB element through strong interaction with Cirip/HIVEP1. *Exp Cell Res* 315:3086-3098.
